# Supplementary material
Source: MDPI journal article supplement (https://www.mdpi.com/2077-0472/11/2/121)
Supplement: s1 [file s1]

## Supplementary Materials - Modeling Profitability in the Jamaican Coffee Industry

### Supplementary File S1: Profitability Calculation Values

The formula used to calculate profitability:

$$Y_i = ((Yld_i - L_i) * P * SYld_i) - ((C_i * CT_i) * SC_i)$$

Where Y is the profit (or loss) in US dollars per unit area in area *i* at farm gate ; Yld is the coffee yield (in 60 lb. boxes) per unit area; L is the percentage crop loss (including loss due to pests and diseases) per unit area; P is the price paid per 60 lb. box of coffee cherry (price per box); SYld is a yield scale factor derived from the suitability model in Mighty (2015) and incorporates JACRA's yields estimations; C is the production costs (per unit area); CT is the contingency cost (accounting for various unforeseen expenses) per unit area; SC is the production scale factor derived from the suitability model in Mighty (2015).

**All values are per unit area (per 0.222 acre or 0.09 hectare)** and figures in tables below are in US (Jamaican) dollars. Price and cost data provided by JACRA.

Conversion to US dollars utilized the following exchange rates:

- 2016-2017 exchange rate: 1USD = 128.6 JMD
- 2018-2019 exchange rate: 1USD = 131.5 JMD

| Income                                 |                                                                            |                                                                          | Expenses             |                            |                            |
|----------------------------------------|----------------------------------------------------------------------------|--------------------------------------------------------------------------|----------------------|----------------------------|----------------------------|
| Variables                              | Values for 2016/2017                                                       | Values for 2018/2019                                                     | Variables            | Values for 2016/2017       | Values for 2018/2019       |
| Ideal mature tree count                | 193.58                                                                     | 193.58                                                                   | Labor Cost           | \$204.09<br>(J\$26,245.73) | \$201.98<br>(J\$26,560.86) |
| Coffee berry production (lbs.)         | 1258.27                                                                    | 1258.27                                                                  | Insecticide Cost     | \$6 (J\$771.29)            | \$5.95 (J\$782.12)         |
| Coffee berry production (60 lb. boxes) | 20.97                                                                      | 20.97                                                                    | Fungicide Cost       | \$12.51<br>(J\$1,609.06)   | \$12.24<br>(J\$1609.03)    |
| Price per box                          | \$77.76 (J\$ 10,000)<br>- JBM Region<br>\$38.88 (J\$5,000) -<br>NBM Region | \$38.02 (J\$5,000)<br>- JBM Region<br>\$26.62 (J\$3,500)<br>- NBM Region | Fertilizer Cost      | \$82.29<br>(J\$10,582.30)  | \$81.65<br>(J\$10,736.59)  |
| Percentage production loss             | 9.63% (JBM Region)<br>10% (NBM Region)                                     | 9.63% (JBM Region)<br>10% (NBM Region)                                   | Herbicide Cost       | \$5.94 (J\$764.12)         | \$5.86 (J\$773.88)         |
| Yield per box                          | Final yield values after accounting for production losses:                 | Final yield values after accounting for production losses:               | Other Materials Cost | \$44.65<br>(J\$5,741.59)   | \$44.23<br>(J\$5,816.28)   |

|                               |                                                                                                                                                                                           |                                                                                                                                                                                           |                                                                         |                                                                                                                                                        |                                                                                                                                                        |
|-------------------------------|-------------------------------------------------------------------------------------------------------------------------------------------------------------------------------------------|-------------------------------------------------------------------------------------------------------------------------------------------------------------------------------------------|-------------------------------------------------------------------------|--------------------------------------------------------------------------------------------------------------------------------------------------------|--------------------------------------------------------------------------------------------------------------------------------------------------------|
|                               | 18.95 (JBM Region)<br>18.87 (NBM Region)                                                                                                                                                  | 18.95 (JBM Region)<br>18.87 (NBM Region)                                                                                                                                                  |                                                                         |                                                                                                                                                        |                                                                                                                                                        |
| <b>Income Total</b>           | Formula = Price per box * Yield per box<br>Final value will vary based on the scenario:<br>\$1,1473.56 (J\$189,500) - JBM Region;<br>\$733.67 (J\$94,350) - NBM Region                    | Formula = Price per box * Yield per box<br>Final value will vary based on the scenario:<br>\$720.53 (\$94,750) - JBM Region;<br>\$502.24 (J\$66,045) - NBM Region                         | <b>Transportation Cost (fertilizer and other materials to the farm)</b> | \$17.26 (J\$2,220)                                                                                                                                     | \$16.88 (J\$2,220)                                                                                                                                     |
| <b>Yield scale factor</b>     | Based on coffee production suitability. Areas rated 7-9 = 1.0 (maximum level of production); areas rated 4-6 = 0.95 (95% of maximum yield); areas rated 1-3 = 0.9 (90% of maximum yield). | Based on coffee production suitability. Areas rated 7-9 = 1.0 (maximum level of production); areas rated 4-6 = 0.95 (95% of maximum yield); areas rated 1-3 = 0.9 (90% of maximum yield). | <b>Equipment Rental Cost</b>                                            | \$14.67 (J\$1,887)                                                                                                                                     | \$14.35 (J\$1,886.96)                                                                                                                                  |
| <b>Adjusted yield per box</b> | Final value influenced by yield scale factor. Formula = Yield per box * Yield scale factor                                                                                                | Final value influenced by yield scale factor. Formula = Yield per box * Yield scale factor                                                                                                | <b>Harvesting Cost</b>                                                  | Cost = \$7.21 (J\$927) per box. Formula = Yield per box * \$7.21 (J\$927) → \$136.60 (J\$17,566.65) - JBM Region; \$136.02 (J\$17,492.49) - NBM Region | Cost = \$7.14 (J\$939) per box. Formula = Yield per box * \$7.14 (J\$939) → \$132.32 (J\$17,794.05) - JBM Region; \$134.74 (J\$17,718.93) - NBM Region |
| <b>Adjusted Income</b>        | Final value influenced by yield scale factor. Formula = Adjusted yield per box * Price per box                                                                                            | Final value influenced by yield scale factor. Formula = Adjusted yield per box * Price per box                                                                                            | <b>Contingency Cost</b>                                                 | <b>5%</b> of the total above-mentioned cost<br>Formula = Sum of all above costs * 0.05                                                                 | <b>10%</b> of the total above-mentioned cost<br>Formula = Sum of all above costs * 0.10                                                                |
|                               |                                                                                                                                                                                           |                                                                                                                                                                                           | <b>Production Total</b>                                                 | Total of above-mentioned costs (including the contingency costs)                                                                                       | Total of above-mentioned costs (including the contingency costs)<br>Formula = sum of all above costs                                                   |

|  |  |  |                                     |                                                                                                                                                                                                                                                                         |                                                                                                                                                                                                                                                                          |
|--|--|--|-------------------------------------|-------------------------------------------------------------------------------------------------------------------------------------------------------------------------------------------------------------------------------------------------------------------------|--------------------------------------------------------------------------------------------------------------------------------------------------------------------------------------------------------------------------------------------------------------------------|
|  |  |  |                                     | Formula = sum of all above costs                                                                                                                                                                                                                                        |                                                                                                                                                                                                                                                                          |
|  |  |  | <b>Production cost scale factor</b> | Based on coffee production suitability. Areas rated 7-9 = 1.0 (base level production costs); areas rated 4-6 = 1.05 (5% increase in production costs); areas rated 1-3 = 1.1 (10% increase in production costs).                                                        | Based on coffee production suitability. Areas rated 7-9 = 1.0 (base level production costs); areas rated 4-6 = 1.05 (5% increase in production costs); areas rated 1-3 = 1.1 (10% increase in production costs).                                                         |
|  |  |  | <b>Adjusted harvesting cost</b>     | Final value influenced by production cost scale factor:<br>Formula = Adjusted yield per box * \$7.21 (J\$927)                                                                                                                                                           | Final value influenced by production cost scale factor:<br>Formula = Adjusted yield per box * \$7.14 (J\$939)                                                                                                                                                            |
|  |  |  | <b>Adjusted contingency cost</b>    | Final value influenced by production cost scale factor:<br>5% of the total above-mentioned cost but using <i>adjusted harvesting costs</i> instead of initial harvesting cost.<br>Formula = Sum of all above costs (but using <i>adjusted harvesting costs</i> ) * 0.05 | Final value influenced by production cost scale factor:<br>10% of the total above-mentioned cost but using <i>adjusted harvesting costs</i> instead of initial harvesting cost.<br>Formula = Sum of all above costs (but using <i>adjusted harvesting costs</i> ) * 0.10 |
|  |  |  | <b>Adjusted production cost</b>     | Total of above-mentioned costs but using <i>adjusted harvesting and contingency costs</i> instead of initial values.<br>Formula = Total of above-mentioned costs (but using <i>adjusted harvesting and adjusted contingency costs</i> )                                 | Total of above-mentioned costs but using <i>adjusted harvesting and contingency costs</i> instead of initial values.<br>Formula = Total of above-mentioned costs (but using <i>adjusted harvesting and adjusted contingency costs</i> )                                  |

|                |                                                                                  |                                                                                  |                         |                                                                                                       |                                                                                                       |
|----------------|----------------------------------------------------------------------------------|----------------------------------------------------------------------------------|-------------------------|-------------------------------------------------------------------------------------------------------|-------------------------------------------------------------------------------------------------------|
|                |                                                                                  |                                                                                  |                         |                                                                                                       |                                                                                                       |
| <b>Revenue</b> | Profit (Loss) based on net revenue.<br>Formula = Income Total – Production Total | Profit (Loss) based on net revenue.<br>Formula = Income Total – Production Total | <b>Adjusted Revenue</b> | Profit (Loss) based on adjusted net revenue.<br>Formula= Adjusted income – Adjusted production costs. | Profit (Loss) based on adjusted net revenue.<br>Formula= Adjusted income – Adjusted production costs. |

**Note:** a complete excel table with even more production details can be obtained by contacting the Data Coordinator at JACRA ([info@jacra.org](mailto:info@jacra.org)).

Supplementary Table S1: Key Profitability Statistics for the 2016-2017 and 2018-2019 coffee years

All values are per unit area (per 0.222 acre or 0.09 hectare) and figures in tables below are in US dollars

| 2016-2017 Coffee Year |                                      |          |          |                                                |        |        |                                      |        |        |
|-----------------------|--------------------------------------|----------|----------|------------------------------------------------|--------|--------|--------------------------------------|--------|--------|
| Area / Region         | Estimated Income per unit area: \$US |          |          | Estimated Production Costs per unit area: \$US |        |        | Estimated Profit per unit area: \$US |        |        |
|                       | Mean                                 | Min      | Max      | Mean                                           | Min    | Max    | Mean                                 | Min    | Max    |
| <b>Overall</b>        | 723.31                               | 660.46   | 1,473.72 | 580.32                                         | 549.64 | 605.25 | 142.99                               | 55.86  | 923.49 |
| <b>JBM</b>            | 1,418.27                             | 1,326.35 | 1,473.72 | 570.93                                         | 550.23 | 605.25 | 847.35                               | 721.10 | 923.49 |
| <b>NBM</b>            | 692.32                               | 660.46   | 733.84   | 580.74                                         | 549.64 | 604.60 | 111.58                               | 55.86  | 184.20 |
| <b>Eastern</b>        | 908.81                               | 660.46   | 1,473.72 | 577.84                                         | 549.64 | 605.25 | 330.96                               | 55.86  | 923.49 |
| <b>Northern</b>       | 693.59                               | 660.46   | 1,473.72 | 580.19                                         | 549.64 | 604.60 | 113.40                               | 55.86  | 923.49 |
| <b>Central</b>        | 690.12                               | 660.46   | 733.84   | 582.39                                         | 549.64 | 604.60 | 107.73                               | 55.86  | 184.20 |
| <b>Western</b>        | 695.77                               | 660.46   | 733.84   | 578.16                                         | 549.64 | 604.60 | 117.61                               | 55.86  | 184.20 |

| 2018-2019 Coffee Year |                                      |        |        |                                                |        |        |                                      |         |        |
|-----------------------|--------------------------------------|--------|--------|------------------------------------------------|--------|--------|--------------------------------------|---------|--------|
| Area / Region         | Estimated Income per unit area: \$US |        |        | Estimated Production Costs per unit area: \$US |        |        | Estimated Profit per unit area: \$US |         |        |
|                       | Mean                                 | Min    | Max    | Mean                                           | Min    | Max    | Mean                                 | Min     | Max    |
| <b>Overall</b>        | 483.31                               | 452.13 | 720.61 | 572.28                                         | 542.03 | 596.86 | -88.91                               | -143.99 | 177.87 |
| <b>JBM</b>            | 693.50                               | 648.55 | 720.61 | 563.02                                         | 542.60 | 596.86 | 130.58                               | 51.65   | 177.87 |
| <b>NBM</b>            | 473.94                               | 452.13 | 502.36 | 572.70                                         | 542.03 | 596.23 | -98.69                               | -143.99 | -39.63 |
| <b>Eastern</b>        | 539.40                               | 452.13 | 720.61 | 569.84                                         | 542.03 | 596.86 | -30.42                               | -143.99 | 177.87 |
| <b>Northern</b>       | 474.60                               | 452.13 | 720.61 | 572.15                                         | 542.03 | 596.23 | -97.48                               | -143.99 | 177.87 |
| <b>Central</b>        | 472.43                               | 452.13 | 502.36 | 574.32                                         | 542.03 | 596.23 | -101.82                              | -143.99 | -39.63 |
| <b>Western</b>        | 476.30                               | 452.13 | 502.36 | 570.15                                         | 542.03 | 596.23 | -93.78                               | -143.99 | -39.63 |

2016-2017 exchange rate: 1USD = 128.6 JMD

2018-2019 exchange rate: 1USD = 131.5 JMD
